# Supplementary material for: The control of red colour by a family of MYB transcription factors in octoploid strawberry (Fragaria × ananassa) fruits
Source: PubMed Central journal article supplement (PMC7152614; doi:10.1111/pbi.13282), 2019-12-12
Supplement: PBI-18-1169-s001.pdf [file PBI-18-1169-s001.pdf]

## **Supporting information for**

**The control of red color by a family of MYB transcription factors in  
octoploid strawberry (*Fragaria* × *ananassa*) fruits**

Wang et al.

Figures: S1-S7

Tables: S1-S7

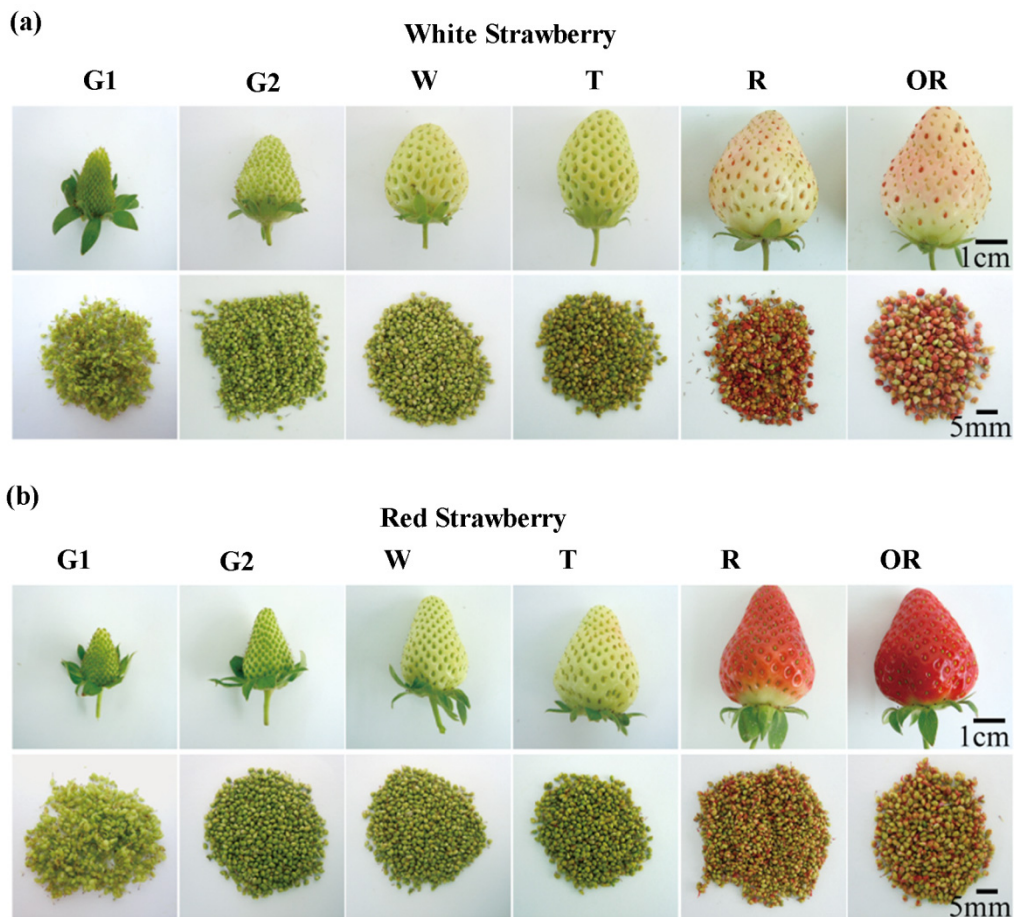

**Figure S1** Friut developmental stages of white and red octoploid strawberry

(a) Based on the seed (lower row) and fruit colors (upper row) of the white octoploid strawberry, six visual developmental stages were defined as: small green fruit stage (G1), large green fruit stage (G2), white fruit stage (W), turning fruit stage (T), ripe fruit stage (R), and over-ripe fruit stage (OR) at 13, 17, 24, 30, 46, and 50 d after anthesis. (b) Based on the seed (lower row) and fruit colors (upper row) of red octoploid strawberry, six visual developmental stages were defined at 7, 12, 17, 19, 26, and 30 d after anthesis. Scale bars in (a, b), Fruit, 1 cm, Seed, 5mm.

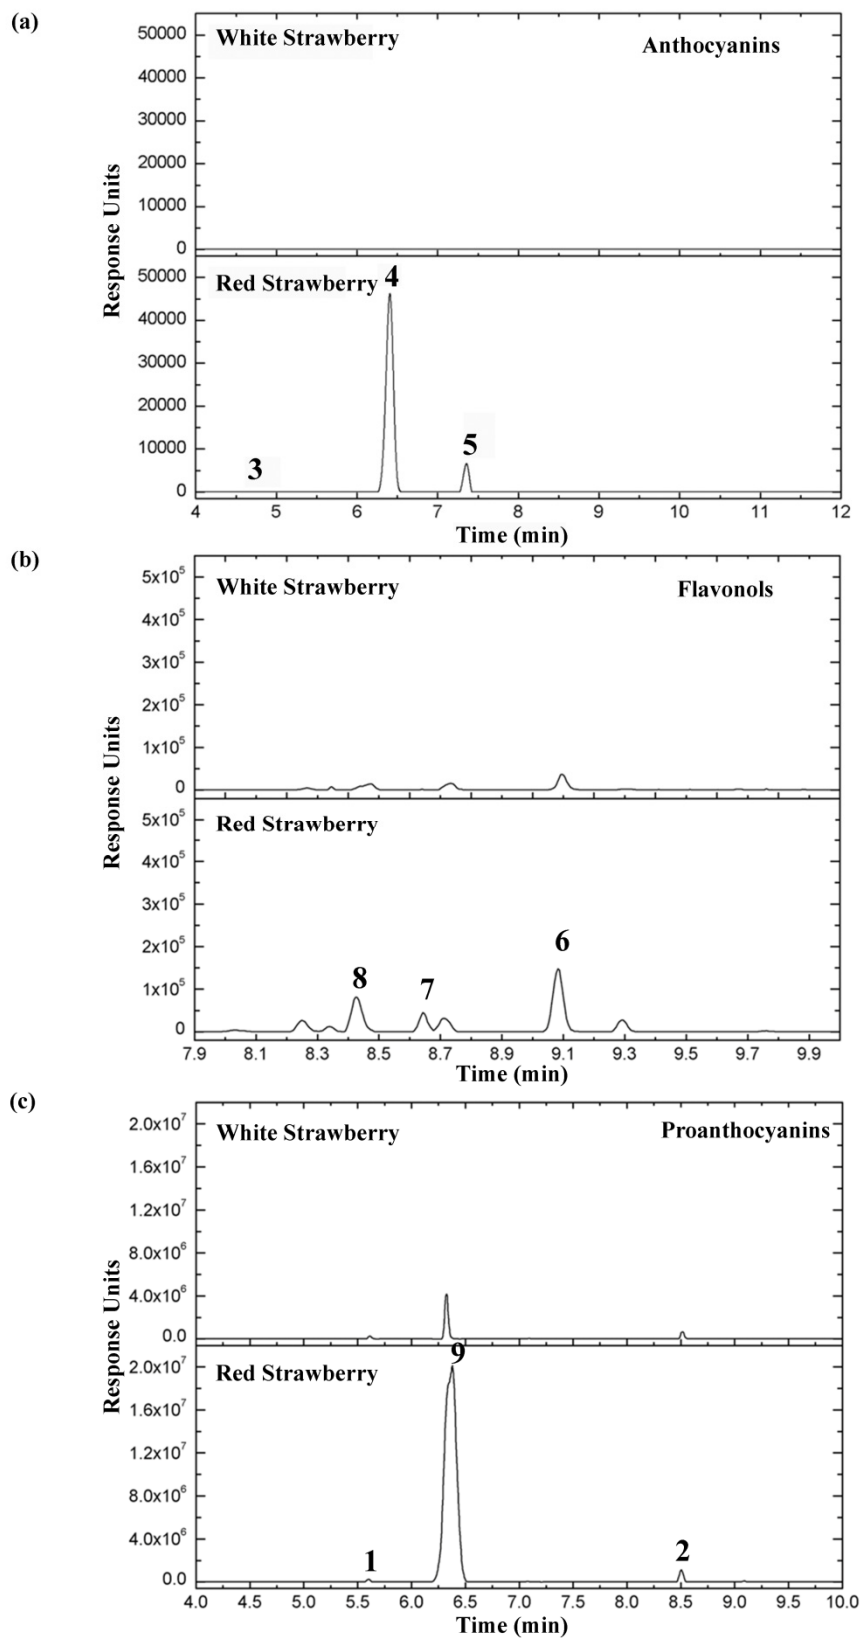

**Figure S2** Chromatographs of anthocyanins, flavonols, and proanthocyanins.

Chromatographic peaks were identified as shown in Table 1.

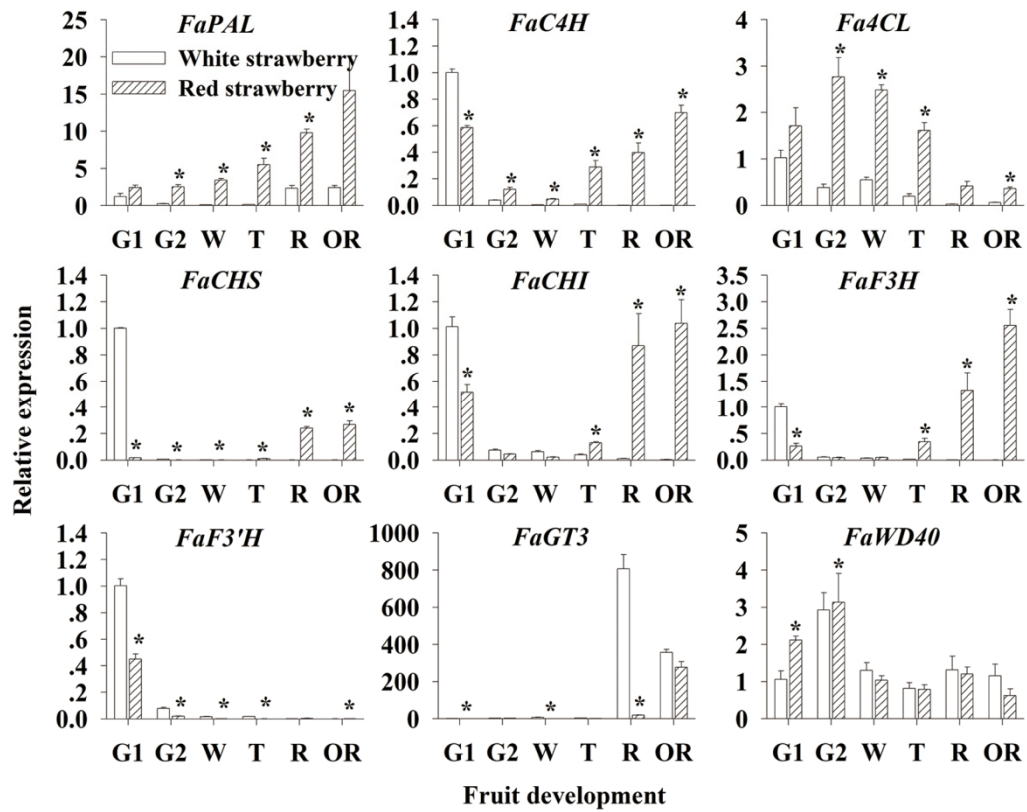

**Figure S3** Transcript levels of structural genes and regulatory genes not included in Figure 3 in the white and red strawberry varieties. Asterisks (\*) represent that the values of the corresponding transcript levels ( $n=3$ ,  $\pm$ SE) are significantly different at  $p < 0.05$  as determined using independent t-test.

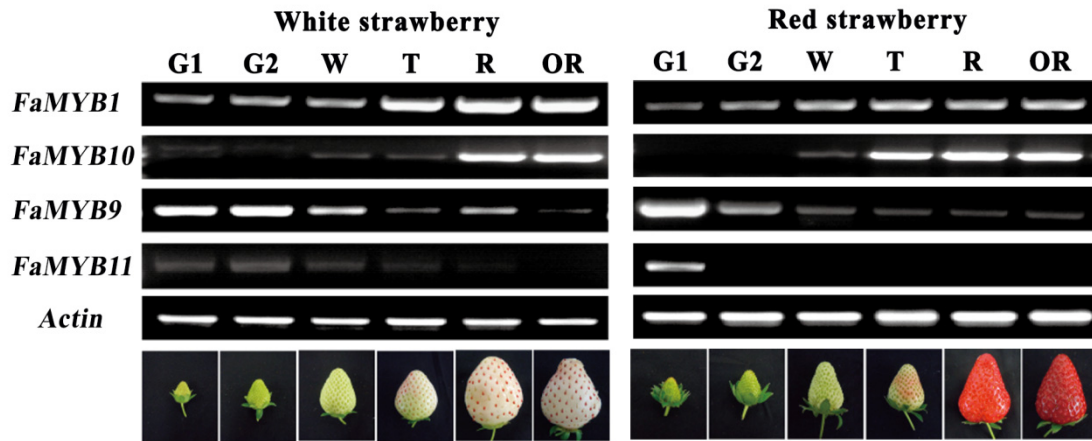

**Figure S4** Transcript levels of regulatory genes in the white and red strawberry varieties. RT-PCR products were examined for *FaMYB1*, *FaMYB10*, *FaMYB9*, and *FaMYB11* transcripts on 1% (w/v) agarose gels, stained with EtBr. *Actin* was used as loading control. At the top, the corresponding developmental stages are shown as G1, G2, W, T, R, and OR with the fruit images of corresponding stages at the left, white strawberry variety and at the right, red strawberry variety.

(a)

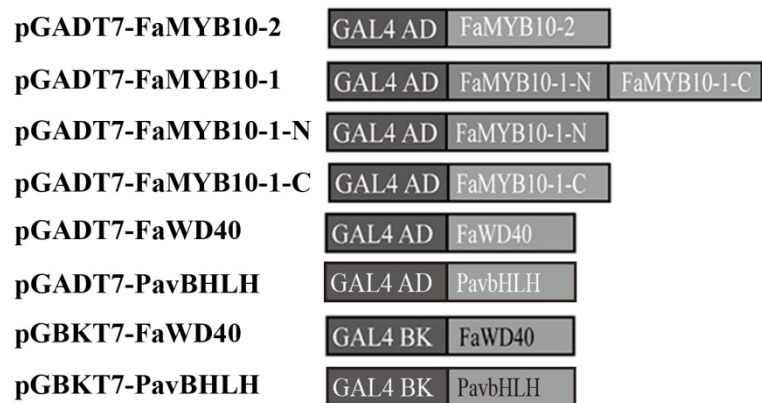

(b)

| AD+                | BK+ | FaWD40 | PavbHLH | pGBKT7 |
|--------------------|-----|--------|---------|--------|
| <b>FaMYB10-2</b>   |     |        |         |        |
| <b>FaMYB10-1</b>   |     | +      | +       |        |
| <b>FaMYB10-1-N</b> |     |        | +       |        |
| <b>FaMYB10-1-C</b> |     |        |         |        |
| <b>FaWD40</b>      |     | +      | +       |        |
| <b>PavbHLH</b>     |     | +      | +       |        |
| <b>pGADT7</b>      |     |        |         |        |

**Figure S5** The constructs and results from yeast two-hybrid assay of FaMYB10-1 or FaMYB10-2 with two regulators (FaWD40 and PavbHLH) for the formation of MBW ternary complex. (a) Schematics of FaMYB10-1, FaMYB10-2, FaWD40, and PavbHLH constructs used in yeast two-hybrid assays. (b) The results of interaction of FaMYB10-2, the different regions of FaMYB10-1 protein (the full-length coding region, the R2R3 MYB domain-containing N-terminal region, the C-terminal region) with FaWD40, PavbHLH.

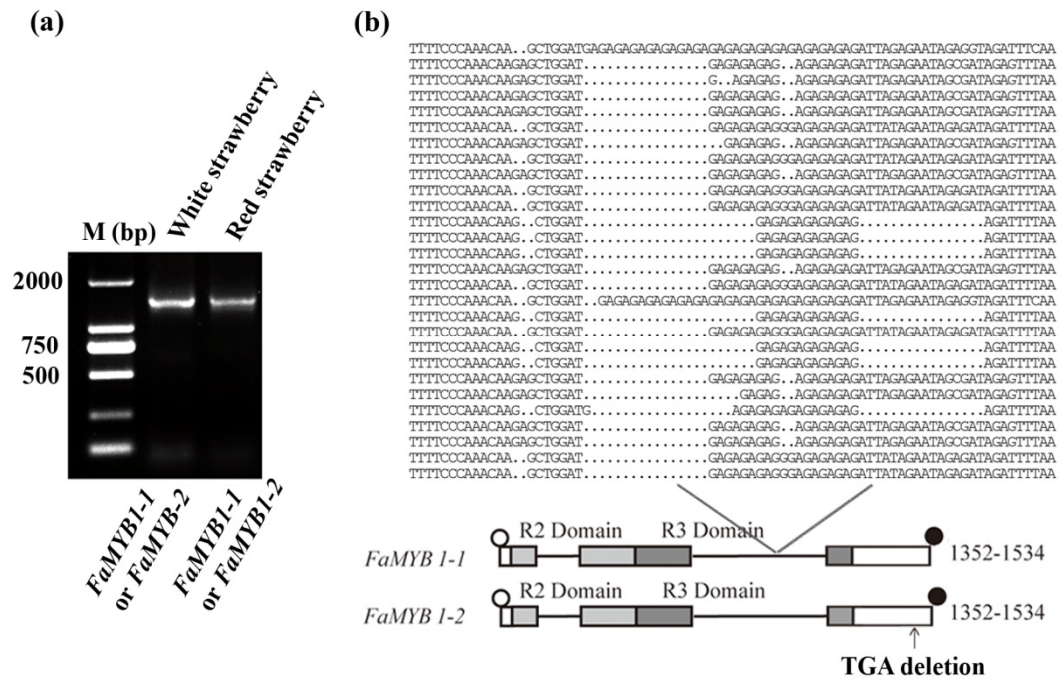

**Figure S6** Genomic sequence analysis for *FaMYB1* alleles in red and white strawberry varieties. (a) The agarose gel of *FaMYB1* alleles. (b) Schematic graph for gene structure of *FaMYB1* alleles. Open and filled black circles represent start codon and stop codon; light gray and dark gray boxes represented R2 and R3 domains in the schematic graph.

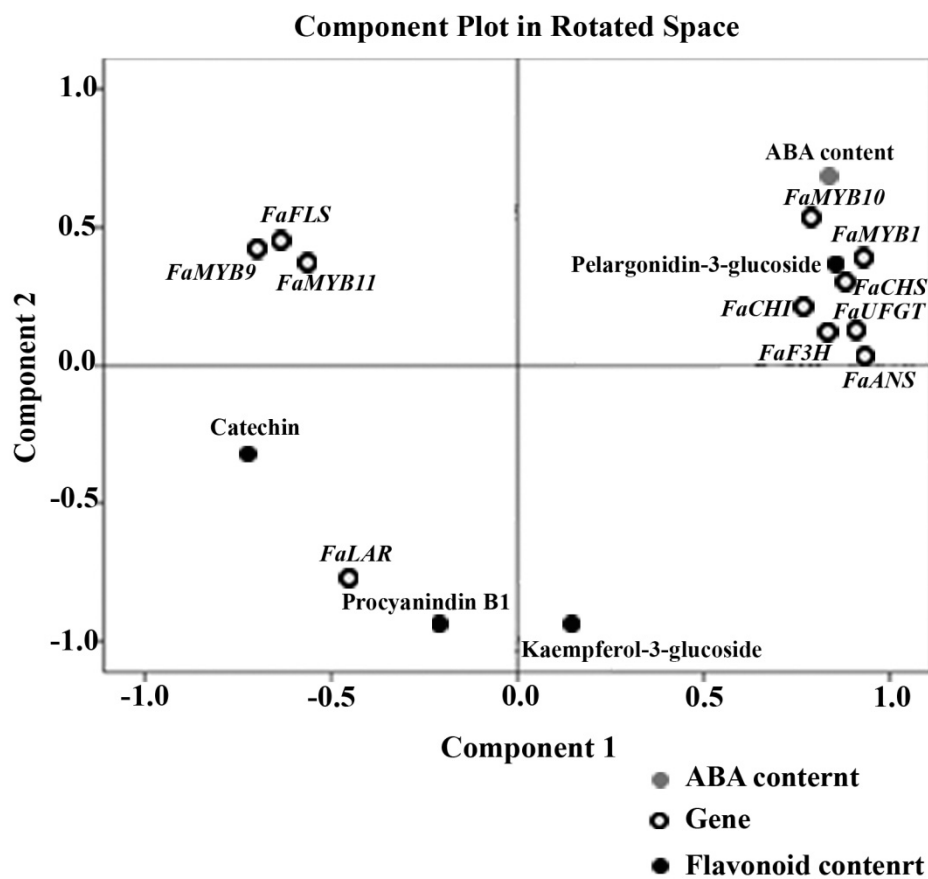

**Figure S7** PCA analysis of key flavonoid components against flavonoid biosynthetic structural genes and transcription-related genes. Two PCA components ‘anthocyanidin index’ and ‘proanthocyanin index’ explained 80.32% of the variance in fruit coloration of red and white strawberry varieties.



**Table S1** Analysis of flavonoid contents.

| Flavonoid Components | W-T<br>( $\mu\text{g/g}$ ) | R-T<br>( $\mu\text{g/g}$ ) | W-R<br>( $\mu\text{g/g}$ ) | R-R<br>( $\mu\text{g/g}$ ) | W-T/R-T<br>(%) | W-R/R-R<br>(%) |
|----------------------|----------------------------|----------------------------|----------------------------|----------------------------|----------------|----------------|
| PA                   | 1584.76                    | 2123.50                    | 922.83                     | 1716.64                    | 74.63%         | 53.76%         |
| AC                   | 189.93                     | 447.65                     | 188.47                     | 126418.85                  | 42.43%         | 0.15%          |
| FL                   | 25.47                      | 260.28                     | 13.50                      | 52.29                      | 9.79%          | 25.82%         |
| PP                   | 1623.32                    | 983.71                     | 166.94                     | 209.51                     | 165.02%        | 79.68%         |

Note: PA: proanthocyanins, AC: anthocyanins, FL: flavonols, PP: the precursors of proanthocyanidins, catechin, and epi-catechin, W-T: White strawberry turning fruit stage, R-T: Red strawberry turning fruit stage, W-R: White strawberry ripe fruit stage, R-R: Red strawberry ripe stage.

**Table S2** The expression of structural genes, *FaANS*, *FaUFGT*, and *FaDFR* in flavonoid biosynthesis in red and white strawberry varieties.

| The Measurement of Structural Genes' Transcript Levels    | <i>FaANS</i> |             |                              |             |             |              | <i>FaUFGT</i> |             |             |             |              |                              | <i>FaDFR</i> |             |             |             |             |              |
|-----------------------------------------------------------|--------------|-------------|------------------------------|-------------|-------------|--------------|---------------|-------------|-------------|-------------|--------------|------------------------------|--------------|-------------|-------------|-------------|-------------|--------------|
|                                                           | G1           | G2          | W                            | T           | R           | OR           | G1            | G2          | W           | T           | R            | OR                           | G1           | G2          | W           | T           | R           | OR           |
| Standardized Transcript Level in White Strawberry Variety | 1.02 ± 0.13  | 0.07 ± 0.03 | 0.05 ± 0.02                  | 0.03 ± 0.02 | 0.03 ± 0.01 | 0.10 ± 0.036 | 1.00 ± 0.03   | 0.07 ± 0.01 | 0.12 ± 0.01 | 0.14 ± 0.01 | 0.05 ± 0.00  | 6.94×10 <sup>-3</sup> ± 0.00 | 1.02 ± 0.12  | 1.19 ± 0.07 | 8.59 ± 0.62 | 7.50 ± 0.48 | 5.22 ± 0.41 | 4.70 ± 0.40  |
| Standardized Transcript Level in Red Strawberry Variety   | 0.47 ± 0.06  | 0.01 ± 0.00 | 7.94×10 <sup>-3</sup> ± 0.00 | 0.23 ± 0.07 | 0.81 ± 0.14 | 0.83 ± 0.19  | 0.40 ± 0.05   | 0.13 ± 0.01 | 2.48 ± 0.38 | 6.29 ± 0.97 | 23.16 ± 1.18 | 38.69 ± 2.97                 | 0.23 ± 0.02  | 5.16 ± 0.58 | 8.65 ± 0.65 | 9.98 ± 1.67 | 7.88 ± 0.54 | 10.32 ± 1.20 |
| Transcript Ratio between Red and White Strawberry Variety | 0.46         | 0.15        | 0.17                         | 6.63        | 25.23       | 7.90         | 0.40          | 1.87        | 21.40       | 44.13       | 449.61       | 5572.49                      | 0.23         | 4.33        | 1.01        | 1.33        | 1.51        | 2.20         |

Note: *FaANS*: anthocyanidin synthase; *FaUFGT*: flavonol-O-glucosyltransferases; *FaDFR*: dihydroflavonol-4-reductase.

**Table S3** The expression of structural genes, *FaLAR*, *FaANR*, and *FaFLS* in flavonoid biosynthesis in red and white strawberry varieties.

| The Measurement of                                        |              |                              |                              |             |                              |                              |              |             |             |             |                              |                               |              |             |             |             |             |             |
|-----------------------------------------------------------|--------------|------------------------------|------------------------------|-------------|------------------------------|------------------------------|--------------|-------------|-------------|-------------|------------------------------|-------------------------------|--------------|-------------|-------------|-------------|-------------|-------------|
| Structural Genes' Transcript                              |              |                              |                              |             |                              |                              |              |             |             |             |                              |                               |              |             |             |             |             |             |
| Levels                                                    |              |                              |                              |             |                              |                              |              |             |             |             |                              |                               |              |             |             |             |             |             |
| Developmental Stage                                       | <i>FaANR</i> |                              |                              |             |                              |                              | <i>FaLAR</i> |             |             |             |                              |                               | <i>FaFLS</i> |             |             |             |             |             |
|                                                           | G1           | G2                           | W                            | T           | R                            | OR                           | G1           | G2          | W           | T           | R                            | OR                            | G1           | G2          | W           | T           | R           | OR          |
| Standardized Transcript Level in White Strawberry Variety | 1.00 ± 0.01  | 0.09 ± 0.01                  | 0.05 ± 0.00                  | 0.03 ± 0.01 | 1.38×10 <sup>-3</sup> ± 0.00 | 1.32×10 <sup>-3</sup> ± 0.00 | 1.00 ± 0.06  | 0.08 ± 0.01 | 0.11 ± 0.02 | 0.04 ± 0.00 | 6.40×10 <sup>-3</sup> ± 0.00 | 5.02×10 <sup>-3</sup> ± 0.000 | 1.04 ± 0.20  | 1.09 ± 0.20 | 2.83 ± 0.57 | 1.60 ± 0.24 | 0.40 ± 0.07 | 0.07 ± 0.01 |
| Standardized Transcript Level in Red Strawberry Variety   | 0.17 ± 0.03  | 4.52×10 <sup>-3</sup> ± 0.00 | 3.22×10 <sup>-3</sup> ± 0.00 | 0.08 ± 0.01 | 0.36 ± 0.10                  | 0.36 ± 0.03                  | 0.21 ± 0.02  | 0.06 ± 0.01 | 0.04 ± 0.00 | 0.06 ± 0.00 | 0.02 ± 0.00                  | 0.02 ± 0.00                   | 0.71 ± 0.09  | 5.16 ± 0.83 | 0.74 ± 0.11 | 0.10 ± 0.02 | 0.24 ± 0.04 | 0.08 ± 0.02 |
| Transcript Ratio between Red and White Strawberry Variety | 0.16         | 0.05                         | 0.07                         | 2.32        | 259.43                       | 274.45                       | 0.21         | 0.75        | 0.39        | 1.41        | 2.47                         | 3.41                          | 0.69         | 4.73        | 0.26        | 0.06        | 0.60        | 1.22        |

Note: *FaANR*: anthocyanidin reductase; *FaLAR*: leucoanthocyanidin reductase; *FaFLS*: flavonol synthase.

**Table S4** The expression of regulatory genes, *FaMYB1*, *FaMYB10*, and *FaWD40* of flavonoid biosynthesis in red and white strawberry varieties.

| The Measurement of<br>Regulatory Genes' Transcript<br>Level  |                | <i>FaMYB1</i>  |                |                |                |                |                    | <i>FaMYB10</i>      |                   |                     |                       |                       |                | <i>FaWD40</i>  |                |                |                |                |  |
|--------------------------------------------------------------|----------------|----------------|----------------|----------------|----------------|----------------|--------------------|---------------------|-------------------|---------------------|-----------------------|-----------------------|----------------|----------------|----------------|----------------|----------------|----------------|--|
| Developmental Stage                                          | G1             | G2             | W              | T              | R              | OR             | G1                 | G2                  | W                 | T                   | R                     | OR                    | G1             | G2             | W              | T              | R              | OR             |  |
| Standardized Transcript Level in<br>White Strawberry Variety | 1.00 ±<br>0.06 | 0.78 ±<br>0.09 | 0.69 ±<br>0.10 | 0.25 ±<br>0.01 | 3.27 ±<br>0.18 | 1.53 ±<br>0.13 | 1.01 ±<br>0.11     | 4.33 ±<br>0.85      | 178.42 ±<br>33.92 | 120.57 ±<br>18.38   | 18245.68 ±<br>3809.03 | 7039.18 ±<br>1502.67  | 1.01 ±<br>0.11 | 2.93 ±<br>0.86 | 3.64 ±<br>0.78 | 1.56 ±<br>0.31 | 1.37 ±<br>0.31 | 1.31 ±<br>0.32 |  |
| Standardized Transcript Level in Red<br>Strawberry Variety   | 3.60 ±<br>0.52 | 3.28 ±<br>0.41 | 0.90 ±<br>0.06 | 1.62 ±<br>0.15 | 5.39 ±<br>0.55 | 7.71 ±<br>0.99 | 24.65<br>±<br>9.77 | 62.78<br>±<br>27.56 | 697.32 ±<br>21.21 | 5408.22 ±<br>487.18 | 22578.06 ±<br>1291.22 | 22472.76 ±<br>2072.94 | 2.74 ±<br>0.40 | 4.73 ±<br>0.79 | 1.49 ±<br>0.11 | 1.35 ±<br>0.08 | 1.33 ±<br>0.47 | 1.27 ±<br>0.23 |  |
| Transcript Ratio between Red and<br>White Strawberry Variety | 3.58           | 4.22           | 1.32           | 6.57           | 1.64           | 5.03           | 24.39              | 14.50               | 3.91              | 44.86               | 1.24                  | 3.19                  | 2.70           | 1.61           | 0.41           | 0.86           | 0.98           | 0.97           |  |

**Table S5** The expression of regulatory genes, *FaMYB9*, and *FaMYB11* of flavonoid biosynthesis in red and white strawberry varieties.

| The Measurement of<br>Regulatory Genes' Transcript<br>Level  |  | <i>FaMYB9</i>  |                |                |                |                |                                 | <i>FaMYB11</i> |                |                |                |                |                |
|--------------------------------------------------------------|--|----------------|----------------|----------------|----------------|----------------|---------------------------------|----------------|----------------|----------------|----------------|----------------|----------------|
| Developmental Stage                                          |  | G1             | G2             | W              | T              | R              | OR                              | G1             | G2             | W              | T              | R              | OR             |
| Standardized Transcript Level in<br>White Strawberry Variety |  | 1.00 ±<br>0.08 | 0.46 ±<br>0.07 | 0.51 ±<br>0.07 | 0.27 ±<br>0.04 | 0.07 ±<br>0.01 | 0.01 ±<br>0.00                  | 1.03 ±<br>0.17 | 0.41 ±<br>0.11 | 0.94 ±<br>0.21 | 0.56 ±<br>0.17 | 0.08 ±<br>0.02 | 0.01 ±<br>0.00 |
| Standardized Transcript Level in Red<br>Strawberry Variety   |  | 1.02 ±<br>0.11 | 0.21 ±<br>0.03 | 0.02 ±<br>0.00 | 0.01 ±<br>0.00 | 0.03 ±<br>0.00 | 7.37×10 <sup>-3</sup> ±<br>0.00 | 3.11 ±<br>0.48 | 0.36 ±<br>0.07 | 0.06 ±<br>0.02 | 0.01 ±<br>0.00 | 0.05 ±<br>0.00 | 0.01 ±<br>0.00 |
| Transcript Ratio between Red and<br>White Strawberry Variety |  | 1.01           | 0.45           | 0.04           | 0.05           | 0.40           | 0.53                            | 3.01           | 0.88           | 0.06           | 0.02           | 0.60           | 1.39           |

**Table S6** The sequences of the oligonucleotide primers used in this work.

| Gene                 | Accession | PrimerSequence (5'→3')                                                                      | Protein                                  | Function                                  | Purpose | Reference (s)                   |
|----------------------|-----------|---------------------------------------------------------------------------------------------|------------------------------------------|-------------------------------------------|---------|---------------------------------|
| <i>FaMYB10</i>       | MG456859  | F: ATGGAGGGTTTCGGTGTGAGAAAAGGT<br>GCATGGACTAAAGAGGAAGATGAACTTCTG<br>R: TCATACGTAGGAGATGTTGA | Myb domain<br>protein 10                 | Regulating<br>anthocyanin<br>biosynthesis | Cloning | Our results                     |
| <i>FaMYB1</i>        | MG456857  | F: ATGAGGAAGCCCTGCTGCGA<br>R: TTAAGCAACTTGAGGATCAG                                          | Myb domain<br>protein 1                  | Regulating<br>anthocyanin<br>biosynthesis | Cloning | Our results                     |
| <i>Actin</i>         | AB116565  | F: GGGTTTGCTGGAGATGAT<br>R: CATCCCAGTTGCTCACAATA                                            | Actin                                    | Actin                                     | qRT-PCR | Our results                     |
| <i>FaMYB1</i>        | AF401220  | F: CCTGCTGCGAGAAGACGGAGAC<br>R: CTCTTACCACAACGACGCAACCCT                                    | Myb domain<br>protein 1                  | Regulating<br>anthocyanin<br>biosynthesis | qRT-PCR | Aharoni <i>et al.</i> ,<br>2001 |
| <i>FaMYB10</i>       | EU155162  | F: TCAAATCAGGCTTAAACAGA<br>R: TTAAAGACCACCTGTTTCCT                                          | Myb domain<br>protein 10                 | Regulating<br>anthocyanin<br>biosynthesis | qRT-PCR | Lin-Wang <i>et al.</i> , 2010   |
| <i>FaMYB9</i>        | JQ989281  | F: CCGATCATCCAAGGAAACA<br>R: CCTAGTGGCCTTGGTTCTTATT                                         | Myb domain<br>protein 9                  | Modifying PA<br>content                   | qRT-PCR | Schaart <i>et al.</i> ,<br>2013 |
| <i>FaMYB11</i>       | JQ989282  | F: GATGGTCTTTGATAGCGGGTAG<br>R: TGGTGGTTTGTGGTGAGTAAT                                       | Myb domain<br>protein 11                 | Modifying PA<br>content                   | qRT-PCR | Schaart <i>et al.</i> ,<br>2013 |
| <i>FabHLH3-delta</i> | JQ989285  | F: ACCGAGTAGTAGCAGACTCCGTGGTAT<br>R: CCATCTGCCATATTAACATCCCTTG                              | Basic<br>helix-loop-<br>helix<br>protein | Regulating<br>anthocyanin<br>biosynthesis | qRT-PCR | Schaart <i>et al.</i> ,<br>2013 |
| <i>FaWD40</i>        | JQ989287  | F: GACTTGAGGTACATGGCGACGATTT<br>R: TCATCCCCACCCGAGCAAATAT                                   | W(Trp)D(Asp)-r<br>epeat protein          | Regulating<br>anthocyanin<br>biosynthesis | qRT-PCR | Schaart <i>et al.</i> ,<br>2013 |

|               |                  |                                                            |                                |                                                  |         |                                              |
|---------------|------------------|------------------------------------------------------------|--------------------------------|--------------------------------------------------|---------|----------------------------------------------|
| <i>FaPAL</i>  | HM641823         | F: TGCTGTTGGGTCTGGTATGG<br>R: ACCTTCTTCGCTTCTTTTCAC        | Phenylalanine<br>ammonia-lyase | Structural genes in<br>flavonoid<br>biosynthesis | qRT-PCR | Pombo <i>et al.</i> ,<br>2011                |
| <i>FaC4H</i>  | DQ898278         | F: TTGCGCAGAGTTTTGAGTATAATT<br>R: TCCTTCATTAGTTGTGACCTGTGT | Cinnamate<br>4-hydroxylase     | Structural genes in<br>flavonoid<br>biosynthesis | qRT-PCR | Saud, <i>et al.</i> ,<br>2009                |
| <i>Fa4CL</i>  | XM_004309<br>901 | F: AAACCTCGGACAGGGTTACGG<br>R: CAGTCGCCTCAGGGTCATTC        | 4-coumarate--C<br>oA ligase    | Structural genes in<br>flavonoid<br>biosynthesis | qRT-PCR | Saud, <i>et al.</i> ,<br>2009                |
| <i>FaCHS</i>  | AY997297         | F: CACCTCCTCAAAGATGTTCTCTG<br>R: TGCCTCGTGGCTTCTAACTTCT    | Chalcone<br>synthase           | Structural genes in<br>flavonoid<br>biosynthesis | qRT-PCR | Kadomura-Ishi<br>kawa, <i>et al.</i><br>2015 |
| <i>FaCHI</i>  | AB201755         | F: TTTCTCCCTCCGTCAAGCC<br>R: ACTCAACCGACTCTGTCAACTCCT      | Chalcone<br>isomerase          | Structural genes in<br>flavonoid<br>biosynthesis | qRT-PCR | Kadomura-Ishi<br>kawa, <i>et al.</i><br>2015 |
| <i>FaF3H</i>  | AY691918         | F: AGGGTGGCTTCATCGTTTCC<br>R: TCAGCTCGTCACTGTACTGCGTTG     | Flavanone<br>3-hydroxylase     | Structural genes in<br>flavonoid<br>biosynthesis | qRT-PCR | Almeida <i>et al.</i><br>2007                |
| <i>FaF3'H</i> | AB665441         | F: AAATCAACGGCTACCACATCC<br>R: CCAGCACCAAAGGGTATGAC        | Flavonoid<br>3'-hydroxylase    | Structural genes in<br>flavonoid<br>biosynthesis | qRT-PCR | Kadomura-Ishi<br>kawa, <i>et al.</i><br>2015 |
| <i>FaFLS</i>  | DQ087252         | F: GGCATGTACCAAATCGTGAA<br>R: ATCCACCCACCCTTTCTTCC         | Flavonol<br>synthase           | Structural genes in<br>flavonoid<br>biosynthesis | qRT-PCR | Almeida <i>et al.</i><br>2007                |
| <i>FaGT3</i>  | AY663786         | F: CTGGTGAGTGCGAAGGAAAT<br>R: AAGGAAGTGTATGACGAGCC         | UDP-glucose<br>glucosyltransfe | Structural genes in<br>flavonoid                 | qRT-PCR | Lunkenbein <i>et al.</i> 2006                |

|                                                             |          |                                                                                    |                                                          |                                                  |                     |                                  |
|-------------------------------------------------------------|----------|------------------------------------------------------------------------------------|----------------------------------------------------------|--------------------------------------------------|---------------------|----------------------------------|
| <i>FaDFR</i>                                                | AF029685 | F: AAGACAGTTCGGAGGTTGGT<br>R: AGAGTTGGGATAATCGTAATG                                | Di-hydroflavono<br>l 4-reductase                         | Structural genes in<br>flavonoid<br>biosynthesis | qRT-PCR             | Moyano <i>et al.</i> ,<br>1998   |
| <i>FaANS</i>                                                | AY695817 | F: GAAGTGCGTACCCAACCTCCATCGT<br>R: ACCTTCTCCTTGTTGACGAGCCC                         | Anthocyanidin<br>synthase                                | Structural genes in<br>flavonoid<br>biosynthesis | qRT-PCR             | Almeida <i>et al.</i> ,<br>2007  |
| <i>FaUFGT</i>                                               | AY575056 | F: TAGCCTTTCCTTCTCCACTCA<br>R: GTAACGCAGTACGGACGTGTCG                              | UDP<br>glucose:flavono<br>id-3-O-glucosyl<br>transferase | Structural genes in<br>flavonoid<br>biosynthesis | qRT-PCR             | Griesser <i>et al.</i> ,<br>2008 |
| <i>FaANR</i>                                                | JX271492 | F: ATGCAAATGCTATCAGGTTCC<br>R: ATGGTCTTCGCTTGGATGGA                                | Anthocyanidin<br>reductase                               | Structural genes in<br>flavonoid<br>biosynthesis | qRT-PCR             | Schaart <i>et al.</i> ,<br>2013  |
| <i>FaLAR</i>                                                | DQ087253 | F: GTGAGGCGTGCGATTGAGA<br>R: TCGACGAAGTAGGCTTTAACC                                 | Leucoanthocya<br>nidin reductase                         | Structural genes in<br>flavonoid<br>biosynthesis | qRT-PCR             | Schaart <i>et al.</i> ,<br>2013  |
| <i>FaMYB10-2-AD-NdeI</i><br><i>FaMYB10-2-AD-XhoI</i>        | MG456860 | F: GAAATTCATATGATGGAGGGTTATTTTCGGTGT<br>R: GAAATTCCTCGAGCTAATTGTAGAGTCTGTGGTGG     | Myb domain<br>protein 10                                 | Regulating<br>anthocyanin<br>biosynthesis        | Yeast<br>two-hybrid | Our results                      |
| <i>FaMYB10-1-AD-NdeI</i><br><i>FaMYB10-1-AD-XhoI</i>        | MG456859 | F: GAAATTCATATGATGGAGGGTTATTTTCGGTGT<br>R: GAAATTCCTCGAGTCATACGTAGGAGATGTTGACT     | Myb domain<br>protei 10                                  | Regulating<br>anthocyanin<br>biosynthesis        | Yeast<br>two-hybrid | Our results                      |
| <i>FaMYB10-1-N-AD-Xh<br/>oI</i><br><i>FaMYB10-1-C-AD-Nd</i> | MG456859 | R: GAAATTCCTCGAGTCATAATTGTAGAGTCTGTGGTGG<br>F: GAAATTCATATGATGGAAAATGTAAGTATTGGTGT | Myb domain<br>protein 10                                 | Regulating<br>anthocyanin<br>biosynthesis        | Yeast<br>two-hybrid | Our results                      |



---

|                                 |          |                                                                                   |                                       |                                           |                         |             |  |
|---------------------------------|----------|-----------------------------------------------------------------------------------|---------------------------------------|-------------------------------------------|-------------------------|-------------|--|
| eI                              |          |                                                                                   |                                       |                                           |                         |             |  |
| <i>FaWD40</i> -AD&<br>BK-NdeI   | JQ989287 | F: GAAATTCATATGATGGAGAATTCGACCCTCGA<br>R: GAAATTGGATCCTCAAACCTTCAAGAGCTGCATC      | WD-repeat<br>protein                  | Regulating<br>anthocyanin<br>biosynthesis | Yeast<br>two-hybrid     | Our results |  |
| <i>FaWD40</i> -AD&<br>BK-BamHI  |          |                                                                                   |                                       |                                           |                         |             |  |
| <i>PavbHLH</i> -AD&<br>BK-EcoRI | KP126521 | F: GAAATTGAATTCATGGCTGCACCGCCAAGCAGCA<br>R: GAAATTCTGCAGTCAGATTGGGGAATTATTGATTTA  | Basic<br>helix-loop- helix<br>protein | Regulating<br>anthocyanin<br>biosynthesis | Yeast<br>two-hybrid     | Our results |  |
| <i>PavbHLH</i> -AD&<br>BK-PstI  |          |                                                                                   |                                       |                                           |                         |             |  |
| <i>FaMYB10</i> -HT-AgeI         | MG456859 | F: GCGACCGGTATGGAGGGTTTCGGTGTGAGA<br>R: GGCCTCGAGTCATACGTAGGAGATGTTGACTAGAT<br>GA | Myb domain<br>protein 10              | Regulating<br>anthocyanin<br>biosynthesis | Transient<br>expression | Our results |  |
| <i>FaMYB10</i> -HT-XhoI         |          |                                                                                   |                                       |                                           |                         |             |  |

---

Note: F, forward; R, reverse. Underlines represent the digestion sites of enzymes.

**Table S7** Information about the MYB protein sequences used for the construction of the neighbor joining tree.

| Gene                 | Accession      | Protein                | Function                                                                             | Identity                | Reference(s)                     |
|----------------------|----------------|------------------------|--------------------------------------------------------------------------------------|-------------------------|----------------------------------|
| <i>AtMYB3</i>        | NP_564176.2    | Myb domain protein 3   | Repressors of phenylpropanoid pathway                                                | 51% ident with FaMYB1   | Lin-Wang <i>et al.</i> , 2010    |
| <i>AtMYB4</i>        | AAC83582.1     | Myb domain protein 4   | Repressors of phenylpropanoid pathway                                                | 50% ident with FaMYB1   | Aharoni <i>et al.</i> , 2001     |
| <i>AtMYB6</i>        | NP_192684.1    | myb domain protein 6   | Repressors of phenylpropanoid pathway                                                | 53% ident with FaMYB1   | Lin-Wang <i>et al.</i> , 2010    |
| <i>AtMYB24</i>       | NP_198851.1    | myb domain protein 24  | Anther development                                                                   | 100% ident with AtMYB24 | Yang <i>et al.</i> , 2007        |
| <i>AtMYB75</i>       | AAG42001.1     | Myb domain protein 75  | Regulating anthocyanin biosynthesis                                                  | 41% ident with FaMYB10  | Gonzalez <i>et al.</i> , 2008    |
| <i>AtMYB90</i>       | NP_176813.1    | Myb domain protein 90  | Regulating anthocyanin biosynthesis                                                  | 42% ident with FaMYB10  | Gonzalez <i>et al.</i> , 2008    |
| <i>FaMYB1</i>        | AAK84064.1     | Myb domain protein 1   | Regulating anthocyanin biosynthesis by interacting with other anthocyanin regulators | 100% ident with FaMYB1  | Aharoni <i>et al.</i> , 2001     |
| <i>FcMYB1</i>        | ADK56163.1     | Myb domain protein 1   | Regulating branching-point of the anthocyanin/PA biosynthesis                        | 100% ident with FaMYB1  | Salvatierra <i>et al.</i> , 2013 |
| <i>FaMYB1-1</i>      | MG456857       | Myb domain protein 1   | Regulating anthocyanin biosynthesis                                                  | 100% ident with FaMYB1  | Our results                      |
| <i>FaMYB1-2</i>      | MG456858       | Myb domain protein 1   | Regulating anthocyanin biosynthesis                                                  | 100% ident with FaMYB1  | Our results                      |
| <i>FaMYB9</i>        | AFL02460.1     | Myb domain protein 9   | Modifying PA content                                                                 | 100% ident with FaMYB9  | Schaart <i>et al.</i> , 2013     |
| <i>FaMYB10</i>       | ABX79947.1     | Myb domain protein 10  | Regulating anthocyanin biosynthesis                                                  | 100% ident with FaMYB10 | Lin-Wang <i>et al.</i> , 2010    |
| <i>FvMYB10</i>       | ABX79948.1     | Myb domain protein 10  | Regulating anthocyanin biosynthesis                                                  | 93% ident with FaMYB10  | Lin-Wang <i>et al.</i> , 2010    |
| <i>FaMYB10-1</i>     | MG456859       | Myb domain protein 10  | Regulating anthocyanin biosynthesis                                                  | 98% ident with FaMYB10  | Our results                      |
| <i>FaMYB10-2</i>     | MG456860       | Myb domain protein 10  | Regulating anthocyanin biosynthesis                                                  | 91% ident with FaMYB10  | Our results                      |
| <i>FaMYB11</i>       | AFL02461.1     | Myb domain protein1 1  | Modifying PA content                                                                 | 100% ident with FaMYB11 | Schaart <i>et al.</i> , 2013     |
| <i>FvMYB305-like</i> | XP_011468270.1 | Myb domain protein 305 | Probably anther development                                                          | 61% ident with AtMYB24  | NCBI database                    |
| <i>MdMYB1</i>        | ABK58136.1     | Myb domain protein 1   | Regulating anthocyanin biosynthesis                                                  | 46% ident with FaMYB10  | Takos <i>et al.</i> , 2006       |
| <i>MdMYB6-like</i>   | XP_008374825.1 | Myb domain protein 6   | Probably regulating anthocyanin biosynthesis                                         | 61% ident with FaMYB1   | Gao <i>et al.</i> , 2011         |
| <i>MdMYB9</i>        | NP_001280749.1 | Myb domain protein 9   | Regulating anthocyanin and PA biosynthesis                                           | 66% ident with FaMYB9   | An <i>et al.</i> , 2015          |
| <i>MdMYB10</i>       | ACQ45201.1     | Myb domain protein 10  | Regulating anthocyanin biosynthesis                                                  | 46% ident with FaMYB10  | Espley <i>et al.</i> , 2007      |

|                      |                |                        |                                              |                        |                                |
|----------------------|----------------|------------------------|----------------------------------------------|------------------------|--------------------------------|
| <i>MdMYB11</i>       | NP_001280958.1 | Myb domain protein 11  | Regulating anthocyanin and PA biosynthesis   | 62% ident with FaMYB11 | An <i>et al.</i> , 2015        |
| <i>MdMYB16</i>       | ADL36756.1     | Myb domain protein 16  | Inhibiting anthocyanin synthesis             | 52% ident with FaMYB1  | Xu <i>et al.</i> , 2017        |
| <i>MdMYB17</i>       | ADL36757.1     | Myb domain protein 17  | Inhibiting anthocyanin synthesis             | 56% ident with FaMYB1  | Lin-Wang <i>et al.</i> , 2011  |
| <i>MdMYB21</i>       | NP_001280981.1 | Myb domain protein 21  | Probably anther development                  | 43% ident with AtMYB24 | NCBI database                  |
| <i>MdMYB111</i>      | ADL36754.1     | Myb domain protein 111 | Inhibiting anthocyanin synthesis             | 60% ident with FaMYB1  | Lin-Wang <i>et al.</i> , 2011  |
| <i>MdMYB305-like</i> | XP_008341440.1 | Myb domain protein 305 | Probably anther development                  | 66% ident with AtMYB24 | NCBI database                  |
| <i>MsMYB10</i>       | ABX71485.1     | Myb domain protein 10  | Regulating anthocyanin biosynthesis          | 46% ident with FaMYB10 | Wang <i>et al.</i> , 2010      |
| <i>ParMYB10</i>      | ABX71490.1     | Myb domain protein 10  | Regulating anthocyanin biosynthesis          | 51% ident with FaMYB10 | Lin-Wang <i>et al.</i> , 2010  |
| <i>PavMYB10.1</i>    | ALM31951.1     | Myb domain protein 10  | Regulating anthocyanin biosynthesis          | 55% ident with FaMYB10 | Jin <i>et al.</i> , 2016       |
| <i>PavMYB11</i>      | ALH21142.1     | Myb domain protein 10  | Probably regulating PA biosynthesis          | 61% ident with FaMYB11 | NCBI database                  |
| <i>PavMYB111</i>     | ALH21138.1     | Myb domain protein 111 | Probably regulating anthocyanin biosynthesis | 61% ident with FaMYB1  | NCBI database                  |
| <i>PavMYBR</i>       | ADY15315.1     | Myb domain protein R   | Regulating flavonoid biosynthesis            | 51% ident with FaMYB1  | NCBI database                  |
| <i>PcfMYB10</i>      | ABX71495.1     | Myb domain protein 10  | Regulating anthocyanin biosynthesis          | 52% ident with FaMYB10 | Lin-Wang <i>et al.</i> , 2010  |
| <i>PdmMYB10</i>      | ABX71492.1     | Myb domain protein 10  | Regulating anthocyanin biosynthesis          | 50% ident with FaMYB10 | Lin-Wang <i>et al.</i> , 2010  |
| <i>PpyMYB10</i>      | ABX71488.1     | Myb domain protein 10  | Regulating anthocyanin biosynthesis          | 47% ident with FaMYB10 | Lin-Wang <i>et al.</i> , 2010  |
| <i>VvMYBA1</i>       | BAE96751.1     | Myb domain protein A1  | Regulating anthocyanin biosynthesis          | 44% ident with FaMYB10 | Yakushiji <i>et al.</i> , 2006 |
| <i>VvMYB6</i>        | XP_002273328.1 | Myb domain protein 6   | Transcription repressor                      | 61% ident with FaMYB1  | NCBI database                  |
| <i>VvMYB24</i>       | NP_001268062.1 | Myb domain protein 24  | Probably regulating anther development       | 65% ident with AtMYB24 | NCBI database                  |
| <i>VvMYB308</i>      | XP_010648383.1 | Myb domain protein 308 | Probably regulating PA biosynthesis          | 57% ident with FaMYB9  | NCBI database                  |

## References

- Aharoni, A., De Vos, C.H.R., Wein, M., Sun, Z.K., Greco, R., Kroon, A., Mol, J.N.M. *et al.* (2001) The strawberry *FaMYB1* transcription factor suppresses anthocyanin and flavonol accumulation in transgenic tobacco. *Plant J.* **28**, 319-332.
- Almeida, J.R.M., D'Amico, E., Preuss, A., Carbone, F., de Vos, C.H.R., Deiml, B., Mourgues, F. *et al.* (2007) Characterization of major enzymes and genes involved in flavonoid and proanthocyanidin biosynthesis during fruit development in strawberry (*Fragaria × ananassa*). *Arch. Biochem. Biophys.* **465**, 61-71.
- An, X.H., Tian, Y., Chen, K.Q., Liu, X.J., Liu, D.D., Xie, X.B., Cheng, C.G. *et al.* (2015) *MdMYB9* and *MdMYB11* are Involved in the regulation of the JA-induced biosynthesis of anthocyanin and proanthocyanidin in apples. *Plant Cell Physiol.* **56**, 650-662.
- Espley, R.V., Hellens, R.P., Putterill, J., Stevenson, D.E., Kuttly-Amma, S. and Allan, A.C. (2007) Red colouration in apple fruit is due to the activity of the MYB transcription factor, *MdMYB10*. *Plant J.* **49**, 414-427.
- Gao, J.J., Shen, X.F., Zhang, Z., Peng, R.H., Xiong, A.S., Xu, J., Zhu, B. *et al.* (2011) The myb transcription factor *MdMYB6* suppresses anthocyanin biosynthesis in transgenic *Arabidopsis*. *Plant Cell Tiss. Org.* **106**, 235-242.
- Gonzalez, A., Zhao, M., Leavitt, J.M. and Lloyd, A.M. (2008) Regulation of the anthocyanin biosynthetic pathway by the *TTG1/bHLH/Myb* transcriptional complex in *Arabidopsis* seedlings. *Plant J.* **53**, 814-827.
- Griesser, M., Hoffmann, T., Bellido, M.L., Rosati, C., Fink, B., Kurtzer, R., Aharoni, A. *et al.* (2008) Redirection of flavonoid biosynthesis through the down-regulation of an anthocyanidin glucosyltransferase in ripening strawberry fruit. *Plant Physiol.* **146**, 1528-1539.
- Jin, W.M., Wang, H., Li, M.F., Wang, J., Yang, Y., Zhang, X.M., Yan, G.H. *et al.* (2016) The R2R3 MYB transcription factor *PavMYB10.1* involves in anthocyanin biosynthesis and determines fruit skin colour in sweet cherry (*Prunus avium* L.). *Plant Biotechnol. J.* **14**, 2120-2133.
- Kadomura-Ishikawa, Y., Miyawaki, K., Takahashi, A., Masuda, T. and Noji, S. (2015) Light and abscisic acid independently regulated *FaMYB10* in *Fragaria x ananassa* fruit. *Planta* **241**, 953-965.
- Lin-Wang, K., Bolitho, K., Grafton, K., Kortstee, A., Karunairetnam, S., McGhie, T., Espley, R. *et al.* (2010) An R2R3 MYB transcription factor associated with regulation of the anthocyanin biosynthetic pathway in Rosaceae. *BMC Plant Biol.* **10**, 50.
- Lin-Wang, K.U.I., Micheletti, D., Palmer, J., Volz, R., Lozano, L., Espley, R., Hellens, R.P. *et al.* (2011) High temperature reduces apple fruit colour via modulation of the anthocyanin regulatory complex. *Plant Cell Environ.* **34**, 1176-1190.
- Lunkenbein, S., Bellido, M., Aharoni, A., Salentijn, E.M.J., Kaldenhoff, R., Coiner, H.A., Muñoz-Blanco, J. *et al.* (2006) Cinnamate metabolism in ripening fruit. characterization of a UDP-Glucose:cinnamate glucosyltransferase from strawberry. *Plant Physiol.* **140**, 1047-1058.
- Moyano, E., Portero-Robles, I., Medina-Escobar, N., Valpuesta, V., Muñoz-Blanco, J. and Luis Caballero, J. (1998) A fruit-specific putative dihydroflavonol 4-reductase gene is differentially expressed in strawberry during the ripening process. *Plant Physiol.* **117**, 711-716.
- Pombo, M., Martínez, G. and Civello, P. (2011) Cloning of *FaPAL6* gene from strawberry fruit and characterization of its expression and enzymatic activity in two cultivars with different anthocyanin accumulation. *Plant Sci.* **181**, 111-118.
- Salvatierra, A., Pimentel, P., Moya-León, M.A. and Herrera, R. (2013) Increased accumulation of

- anthocyanins in *Fragaria chiloensis* fruits by transient suppression of *FcMYB1* gene. *Phytochemistry* **90**, 25-36.
- Saud, G., Carbone, F., Perrotta, G., Figueroa, C.R., Moya, M., Herrera, R., Retamales, J.B. *et al.* (2009) Transcript profiling suggests transcriptional repression of the flavonoid pathway in the white-fruited Chilean strawberry, *Fragaria chiloensis* (L.) Mill. *Genet. Resour. Crop Ev.* **56**, 895–903.
- Schaart, J.G., Dubos, C., De La Fuente, I.R., van Houwelingen, A.M.M.L., de Vos, R.C.H., Jonker, H.H., Xu, W.J. *et al.* (2013) Identification and characterization of MYB-bHLH-WD40 regulatory complexes controlling proanthocyanidin biosynthesis in strawberry (*Fragaria x ananassa*) fruits. *New Phytol.* **197**, 454-467.
- Takos, A.M., Jaffe, F.W., Jacob, S.R., Bogs, J., Robinson, S.P. and Walker, A.R. (2006) Light-induced expression of a *MYB* gene regulates anthocyanin biosynthesis in red apples. *Plant Physiol.* **142**, 1216-1232.
- Wang, Y., Zhang, Y., Feng, S., Tian, C., Wang, H., Liu, Z., Song, Y. and Chen, X. (2010) Cloning, sequence analysis and expression in *E. coli* of MsMYB10 gene from *Malus sieversii* f. *neidzwetzkyana*. *Scientia Agricultura Sinica* **43**, 2735-2743.
- Xu, H., Wang, N., Liu, J., Qu, C., Wang, Y., Jiang, S., Lu, N. *et al.* (2017) The molecular mechanism underlying anthocyanin metabolism in apple using the MdMYB16 and MdbHLH33 genes. *Plant Mol. Biol.* **94**, 149-165.
- Yakushiji, H., Kobayashi, S., Goto-Yamamoto, N., Tae Jeong, S., Sueta, T., Mitani, N. and Azuma, A. (2006) A skin color mutation of grapevine, from black-skinned pinot noir to white-skinned pinot blanc, is caused by deletion of the functional *VvmybA1* allele. *Biosci. Biotech. Bioch.* **70**, 1506-1508.
- Yang, X., Li, J., Pei, M., Gu, H., Chen, Z. and Qu, L. J. (2007) Over-expression of a flower-specific transcription factor gene *AtMYB24* causes aberrant anther development. *Plant Cell Rep.* **26**, 219-228.
